# Supplementary material
Source: publisher site journal article supplement (https://www.dovepress.com/article/442353)
Supplement: Supplementary file 1 [file get_supplementary_file.php]

**Supplementary Table 1** Univariate Logistic Regression Analysis for the Relationship Between Risk Factors and 3-month Mortality in the Training Cohort

| Variables | OR (95% CI) | *P* value |
| --- | --- | --- |
| **Demographics** | | |
| Gender | 1.54 (0.88-2.68) | 0.127 |
| Age | 1.05 (1.02-1.09) | 0.001 |
| Smoking | 0.76 (0.33-1.74) | 0.520 |
| Drinking | 0.20 (0.05-0.86) | 0.031 |
| **Medical history** | | |
| Hypertension | 1.23 (0.64-2.35) | 0.530 |
| Diabetes mellitus | 1.32 (0.71-2.45) | 0.376 |
| Heart failure | 1.30 (0.57-2.96) | 0.528 |
| Stroke/TIA | 1.13 (0.64-1.99) | 0.683 |
| **Medication history** | | |
| Antithrombotic drugs | 1.03 (0.59-1.81) | 0.905 |
| Antihypertensive drugs | 1.13 (0.62-2.04) | 0.694 |
| Diuretics | 0.25 (0.03-1.93) | 0.182 |
| **Baseline score** | | |
| NIHSS score | 1.14 (1.10-1.18) | <0.001 |
| CHA2DS2-VASc score | 1.17 (1.00-1.37) | 0.053 |
| HAS-BLED score | 1.10 (0.84-1.44) | 0.492 |
| **Treatment after onset** | | |
| Thrombolytic therapy | 0.78 (0.40-1.51) | 0.461 |
| Thrombectomy therapy | 2.72 (1.53-4.84) | 0.001 |
| Early introduction of NOACs | 0.12 (0.05-0.32) | <0.001 |
| **Stroke-associated infection** | | |
| Pneumonia | 7.27 (3.90-13.58) | <0.001 |
| UTI | 0.73 (0.24-2.24) | 0.584 |
| **Baseline laboratory parameters** | | |
| WBC | 1.03 (0.93-1.14) | 0.587 |
| RBC | 0.72 (0.47-1.11) | 0.141 |
| PLT | 1.00 (0.99-1.00) | 0.171 |
| TG | 0.95 (0.53-1.71) | 0.859 |
| TC | 0.72 (0.53-0.97) | 0.033 |
| eGFR | 1.00 (0.99-1.01) | 0.463 |
| PT | 0.92 (0.79-1.08) | 0.313 |
| APTT | 0.92 (0.84-1.01) | 0.067 |
| TT | 1.00 (0.98-1.02) | 0.778 |
| FIB | 0.98 (0.74-1.31) | 0.892 |
| D-dimer | 1.00 (0.98-1.02) | 0.826 |

**Abbreviations:** OR, odds ratio; CI, confidence interval; TIA, transient ischemic attack; NIHSS, National Institutes of Health Stroke Scale; NOACs, novel oral anticoagulants; UTI, urinary tract infection; WBC, white blood cell; RBC, red blood cell; PLT, platelet count; TG, triglyceride; TC, total cholesterol; eGFR, estimated glomerular filtration rate; PT, prothrombin time; APTT, activated partial prothrombin time; TT, thrombin time; FIB, fibrinogen.
